# Supplementary material for: High biodegradability of water-soluble organic carbon in soils at the southern margin of the boreal forest
Source: Copernicus journal article supplement (doi:10.5194/soil-11-793-2025), 2025-10-09
Supplement: Supplementary file 1 [file soil-11-793-2025-supplement.pdf]

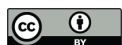

## *Supplement of*

# **High biodegradability of water-soluble organic carbon in soils at the southern margin of the boreal forest**

**Yuqi Zhu et al.**

*Correspondence to:* Shuying Zang (zsy6311@hrbnu.edu.cn) and Xiaodong Wu (wuxd@lzb.ac.cn)

The copyright of individual parts of the supplement might differ from the article licence.

## Supplementary Text:2

## Supplementary Table:1

## Supplementary Figure:2

## Supplementary Text

### S1. Additional details of the analysis of WSOM by spectroscopy

Fluorescence Regional Integration (FRI) and the percentage of fluorescence response ( $P_{i,n}$ ) were used for further analysis of the fluorescence spectra in five regions. The volume of the Excitation-Emission Matrix (EEM)  $i(\Phi_i)$  was obtained through the formula (1) by integrating the area under the excitation-emission spectra.  $\Delta\lambda_{ex}$  and  $\Delta\lambda_{em}$  represent the intervals of excitation and emission wavelengths, respectively.  $I(\lambda_{ex}\lambda_{em})$  is the fluorescence intensity for each matching set of excitation-emission wavelengths.  $MF_i$  is the multiplication factor for each region. The normalized volumes of the excitation-emission regions ( $\Phi_{i,n}$ ,  $\Phi_{T,n}$ ) and the percentage of fluorescence response ( $P_{i,n}$ ) were calculated using the following formulas (Chen et al., 2003):

$$\Phi_i = \sum_{ex} \sum_{em} I(\lambda_{ex}\lambda_{em}) \Delta\lambda_{ex} \Delta\lambda_{em}$$

$$\Phi_{i,n} = MF_i \Phi_i$$

$$\Phi_{i,n} = \sum_{i=1}^5 \Phi_{i,n}$$

$$P_{i,n} = \frac{\Phi_{i,n}}{\Phi_{T,n}} \times 100\%$$

### S2. Calculation of BWSOC content and $k$

The calculation formulas for the content and relative proportion of BWSOC under specific incubation days are as follows (Houston, 2012; Vonk et al., 2015):

$$BWSOC_t = WSOC_{t=0} - WSOC_t$$

$$BWSOC(\%)_t = \frac{BWSOC_t}{WSOC_{t=0}} \times 100\% = \frac{WSOC_{t=0} - WSOC_t}{WSOC_{t=0}} \times 100\%$$

Microbial utilization of low-concentration substrates follows first-order reaction kinetics, wherein

the change in BWSOC over time follows the formula:

$$\frac{dBWSOC}{dt} = kBWSOC$$

Where BWSOC represents the microbial degradable water-soluble organic carbon at any given time,  $k$  is the reaction kinetic constant, and  $t$  is the incubation time. Integrating the above equation yields:

$$BWSOC = BWSOC_u \times e^{-kt}$$

Where  $BWSOC_u$  is the total amount of microbial degradable water-soluble organic carbon in the substrate. Therefore, the value of  $BWSOC_t$  at any incubation time  $t$  can be expressed as:

$$BWSOC_t = BWSOC_u \times (1 - e^{-kt})$$

Non-linear exponential fitting is performed on  $BWSOC_t$  to obtain the reaction kinetic constant  $k$  value.

### Supplementary Table

**Table S1. Partition range of fluorescence spectra, Ex represents the excitation wavelength, and Em represents the emission wavelength.**

| Region | Ex      | Em      | Component                               |
|--------|---------|---------|-----------------------------------------|
| I      | 220-250 | 250-330 | Tyrosine-like aromatic protein          |
| II     | 220-250 | 330-380 | Tryptophan-like aromatic protein        |
| III    | 220-250 | 380-500 | Fulvic acid-like matter                 |
| IV     | 250-400 | 250-380 | Soluble microbial byproduct-like matter |
| V      | 250-400 | 380-500 | Humic acid-like matter                  |

**Table S2. Simple linear-regression statistics for BWSOC and the degradation constant ( $k$ ) versus the SUVA<sub>254</sub> and E250/E365**

| Outcome | Predictor           | Slope $\beta$ | SE    | 95 % CI         | t     | p     | R <sup>2</sup> |
|---------|---------------------|---------------|-------|-----------------|-------|-------|----------------|
| BWSOC   | SUVA <sub>254</sub> | -0.158        | 0.062 | -0.295 – -0.020 | -2.55 | 0.029 | 0.395          |
| BWSOC   | E250/E365           | 0.003         | 0.001 | 0.0003 – 0.006  | 2.44  | 0.035 | 0.374          |
| $k$     | SUVA <sub>254</sub> | 0.014         | 0.262 | -0.570 – 0.599  | 0.06  | 0.957 | 0.000          |
| $k$     | E250/E365           | -0.006        | 0.005 | -0.018 – 0.005  | -1.25 | 0.240 | 0.135          |

**Table S3. Model 1 – multiple linear regression predicting BWSOC (g kg<sup>-1</sup>)**

| Predictor                                                                                        | B      | SE    | $\beta$ | 95 % CI        | t      | p     | VIF   |
|--------------------------------------------------------------------------------------------------|--------|-------|---------|----------------|--------|-------|-------|
| Intercept                                                                                        | 0.203  | 0.059 | -       | 0.070 – 0.336  | 3.446  | 0.007 | -     |
| <i>E250/E365</i>                                                                                 | 0.002  | 0.002 | 0.354   | -0.002 – 0.006 | 1.115  | 0.294 | 1.705 |
| SUVA <sub>254</sub>                                                                              | -0.100 | 0.080 | -0.401  | -0.281 – 0.080 | -1.262 | 0.239 | 1.705 |
| Model fit: n = 12; R = 0.684; R <sup>2</sup> = 0.468; Adjusted R <sup>2</sup> = 0.350; F = 3.963 |        |       |         |                |        |       |       |

**Table S4. Model 2 – multiple linear regression predicting *k***

| Predictor                                                                                        | B      | SE    | $\beta$ | 95 % CI        | t      | p     | VIF   |
|--------------------------------------------------------------------------------------------------|--------|-------|---------|----------------|--------|-------|-------|
| Intercept                                                                                        | 0.565  | 0.236 | -       | 0.031 – 1.098  | 2.394  | 0.040 | -     |
| <i>E250/E365</i>                                                                                 | -0.011 | 0.007 | -0.607  | -0.260 – 0.005 | -1.577 | 0.149 | 1.705 |
| SUVA <sub>254</sub>                                                                              | -0.309 | 0.319 | -0.373  | -1.032 – 0.413 | -0.969 | 0.358 | 1.705 |
| Model fit: n = 12; R = 0.466; R <sup>2</sup> = 0.217; Adjusted R <sup>2</sup> = 0.043; F = 1.245 |        |       |         |                |        |       |       |

**Supplementary Figure**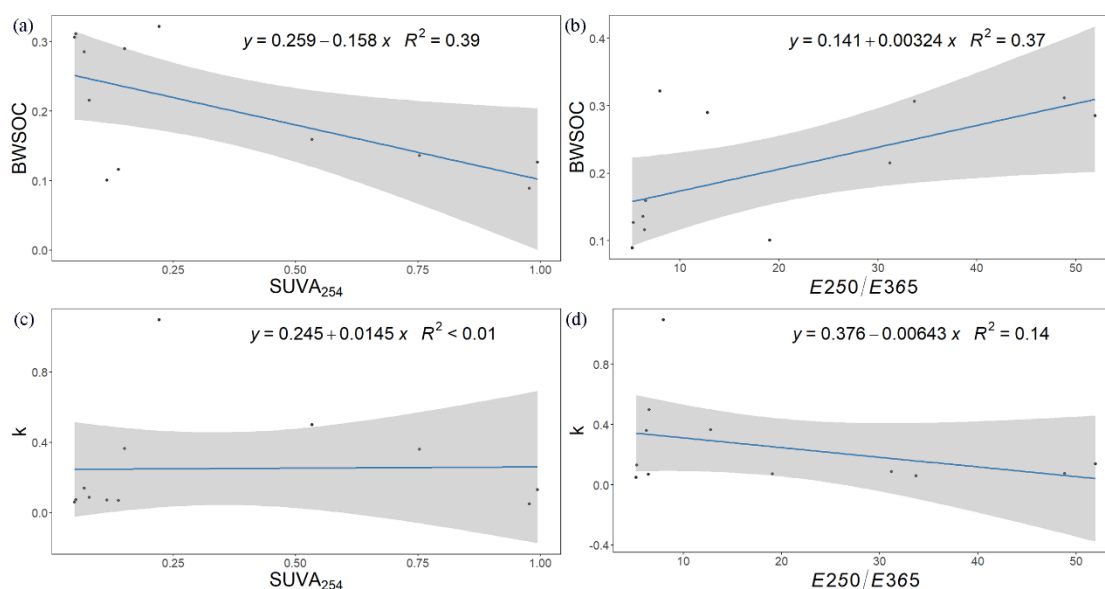

Fig S1. Simple linear regressions between the optical indices and the response variables requested by the reviewer. (a) BWSOC vs SUVA<sub>254</sub>; (b) BWSOC vs *E250/E365*; (c) *k* vs SUVA<sub>254</sub>; (d) *k* vs *E250/E365*. Grey bands are 95 % confidence intervals. Equations and coefficients of determination ( $R^2$ ) are printed inside each panel.

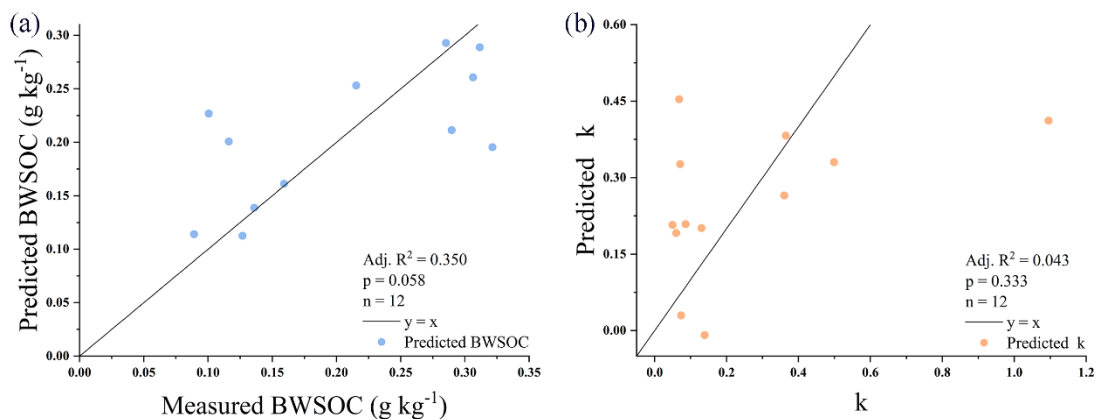

Fig S2. Observed-versus-predicted plots for the multiple-linear-regression models. (a) BWSOC; (b) degradation constant ( $k$ ).

## Reference

- Chen, W., Westerhoff, P., Leenheer, J. A., and Booksh, K.: Fluorescence Excitation–Emission Matrix Regional Integration to Quantify Spectra for Dissolved Organic Matter, *Environmental Science & Technology*, 37, 5701–5710, 10.1021/es034354c, 2003.
- Houston, P. L.: Chemical kinetics and reaction dynamics, Courier Corporation 2012.
- Vonk, J. E., Tank, S. E., Mann, P. J., Spencer, R. G. M., Treat, C. C., Striegl, R. G., Abbott, B. W., and Wickland, K. P.: Biodegradability of dissolved organic carbon in permafrost soils and aquatic systems: a meta-analysis, *Biogeosciences*, 12, 6915–6930, 10.5194/bg-12-6915-2015, 2015.
